# Supplementary material
Source: publisher figshare collection journal article supplement (https://acs.figshare.com/ndownloader/files/3826222)
Supplement: Supplementary file 1 [file 3826222]

## Supporting Information

### Eosin Y covalently anchored on reduced graphene oxide as an efficient and recyclable photocatalyst for the aerobic oxidation of $\alpha$ -aryl halogen derivatives

*Zhen Li, Wenfeng Zhang, Qingshan Zhao, Hanying Gu, Yang Li, Guoliang Zhang,*

*Fengbao Zhang, and Xiaobin Fan\**

State Key Laboratory of Chemical Engineering, School of Chemical Engineering and  
Technology, Collaborative Innovation Center of Chemical Science and Engineering,

Tianjin University, Tianjin 300072, China

Tel./Fax: +86 22-27408778; E-mail: xiaobinfan@tju.edu.cn

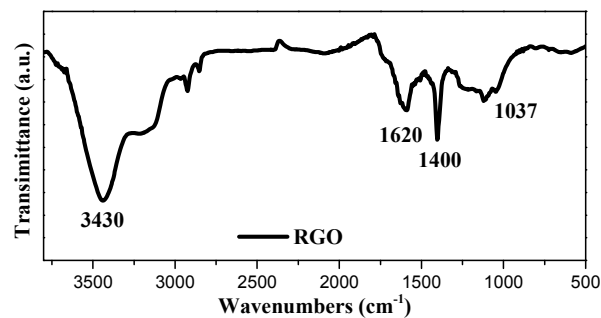

**Figure S1.** Fourier transform infrared (FTIR) spectrum of reduced graphene oxide (RGO)

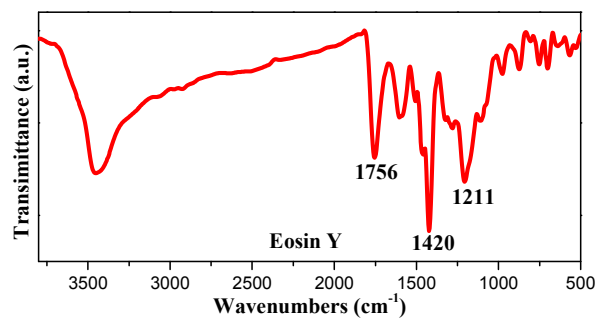

**Figure S2.** Fourier transform infrared (FTIR) spectrum of Eosin Y (EY)

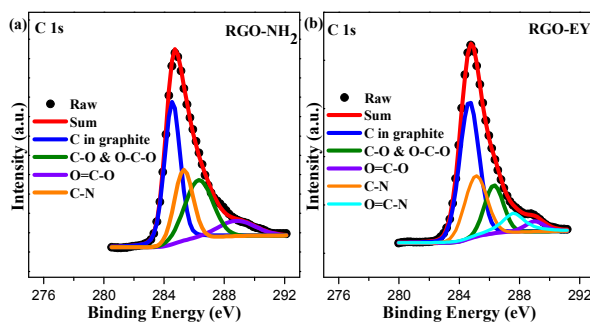

**Figure S3.** C 1s XPS spectra of (a) RGO-NH<sub>2</sub> and (b) RGO-EY

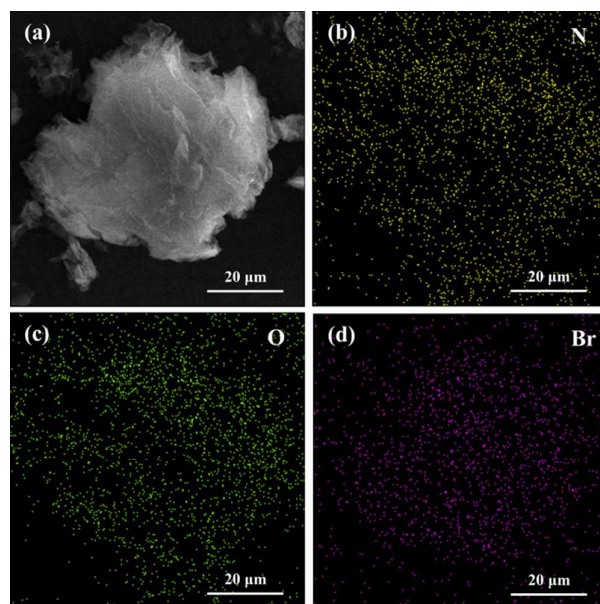

**Figure S4.** (a) SEM image of RGO-EY and corresponding quantitative EDS mapping of (b) N, (c) O and (d) Br

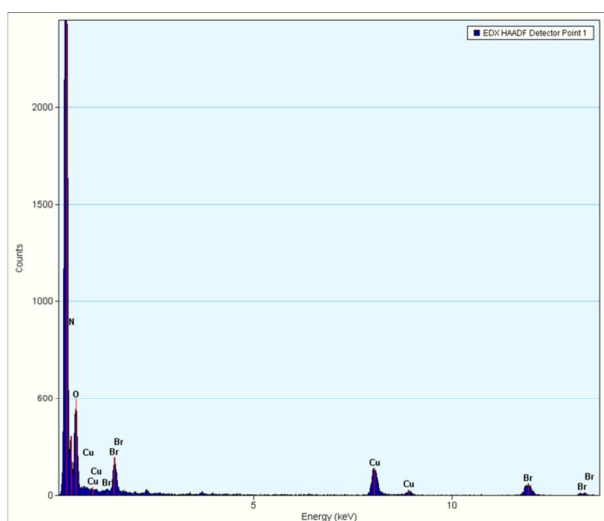

**Figure S5.** EDS spectrum of RGO-EY.

Note that the GO sample was placed on a copper grid in the testing process. As a result, signals of Cu could also be detected.

| <b>Table S1.</b> EDS Quantification Results of RGO-EY |         |          |          |
|-------------------------------------------------------|---------|----------|----------|
| Entry                                                 | Element | Weight % | Atomic % |
| 1                                                     | C(K)    | 75.91    | 81.63    |
| 2                                                     | N(K)    | 10.99    | 10.13    |
| 3                                                     | O(K)    | 9.47     | 7.65     |
| 4                                                     | Br(K)   | 3.63     | 0.59     |

The element atomic ratio of Br in the final RGO–EY is 0.59%, presenting an EY loading content of  $0.12 \text{ mmol} \cdot \text{g}^{-1}$ .

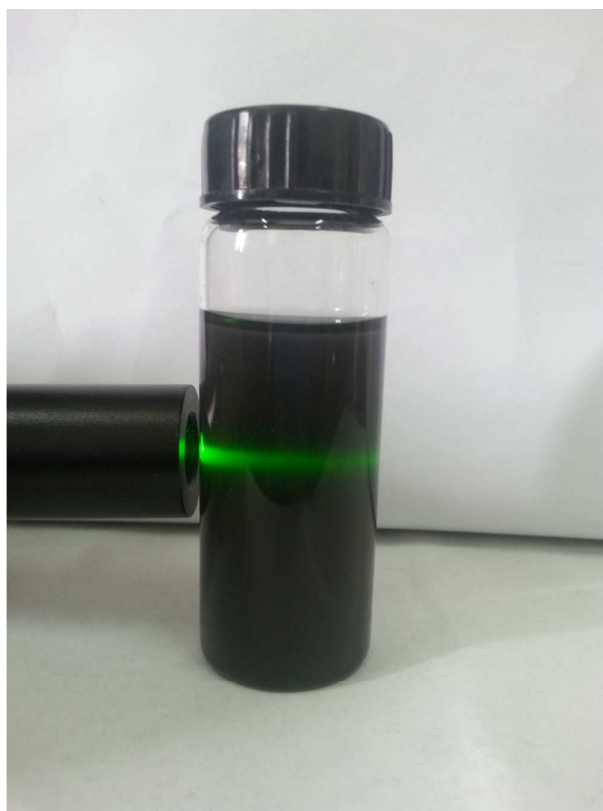

**Figure S6.** Tyndall effect exhibited by a RGO-EY dispersion in DMA.

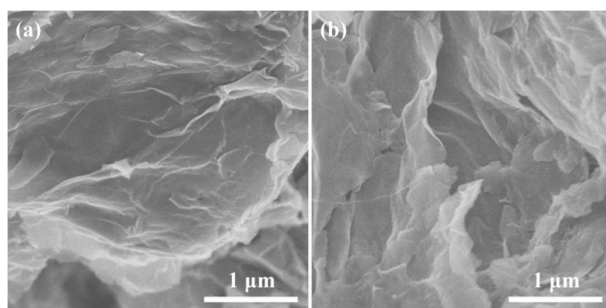

**Figure S7.** SEM images of (a) RGO-EY and (b) RGO-EY after recyclable testing

**Table S2.** Synthesis of  $\alpha$ -Aryl Carbonyl Compounds 2 from 1 by Eosin Y<sup>a</sup>

| Entry | 1                                                                                   | Product (2)                                                                         | Yield[%] <sup>b</sup> | Selectivity[%] |
|-------|-------------------------------------------------------------------------------------|-------------------------------------------------------------------------------------|-----------------------|----------------|
| 1     | 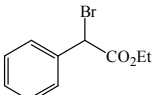 |  | 42                    | 66             |
| 2     |  |  | 37                    | 68             |
| 3     |  |  | 76                    | 78             |
| 4     |  |  | 15                    | 49             |

<sup>a</sup> Standard conditions: 1a-d (1.0 mmol), Li<sub>2</sub>CO<sub>3</sub> (1.0 mmol), 4-methoxypyridine (0.2 mmol) and catalyst (20 mg) were added in DMA (15 mL) under air at 25 °C. Irradiation time using a 24 W compact fluorescent bulb at 20 cm was 24 h. <sup>b</sup> Calibrated yields determined by GC.

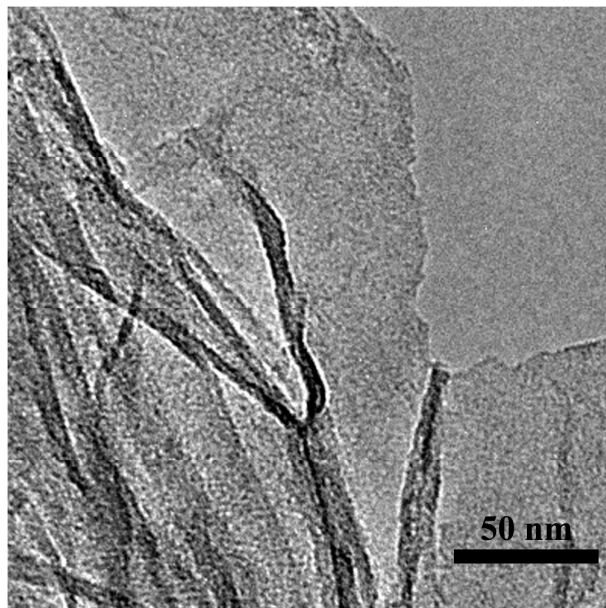

**Figure S8.** The TEM image of RGO-EY
